# Supplementary material for: Photosynthetic Co-production of Succinate and Ethylene in a Fast-Growing Cyanobacterium, Synechococcus elongatus PCC 11801
Source: MDPI journal article supplement (doi:10.3390/metabo10060250), 2020-06-16
Supplement: s1 [file s1]

## Supplementary Information

### Photosynthetic co-production of succinate and ethylene in a fast-growing cyanobacterium, *Synechococcus elongatus* PCC 11801

Annesha Sengupta <sup>1</sup>, Prem Pritam <sup>1#</sup>, Damini Jaiswal <sup>1#</sup>, Anindita Bandyopadhyay <sup>2</sup>, Himadri B. Pakrasi <sup>2,3,\*</sup>, and Pramod P. Wangikar <sup>1,4,5,\*</sup>

<sup>1</sup>Department of Chemical Engineering, Indian Institute of Technology Bombay, Powai, Mumbai 400076 India.

<sup>2</sup>Department of Biology, Washington University, St. Louis, Missouri, USA

<sup>3</sup>Department of Energy, Environmental and Chemical Engineering, Washington University, St. Louis, Missouri, USA.

<sup>4</sup>DBT-Pan IIT Center for Bioenergy, Indian Institute of Technology Bombay, Powai, Mumbai 400076 India.

<sup>5</sup>Wadhvani Research Center for Bioengineering, Indian Institute of Technology Bombay, Powai, Mumbai 400076 India.

#Contributed equally

\*Correspondence: wangikar@iitb.ac.in; Tel: +91 22 25767232; Fax: + 91 22 25726895 (P.P.W).  
pakrasi@wustl.edu ; Ph: 314-935-6853 (H.B.P).

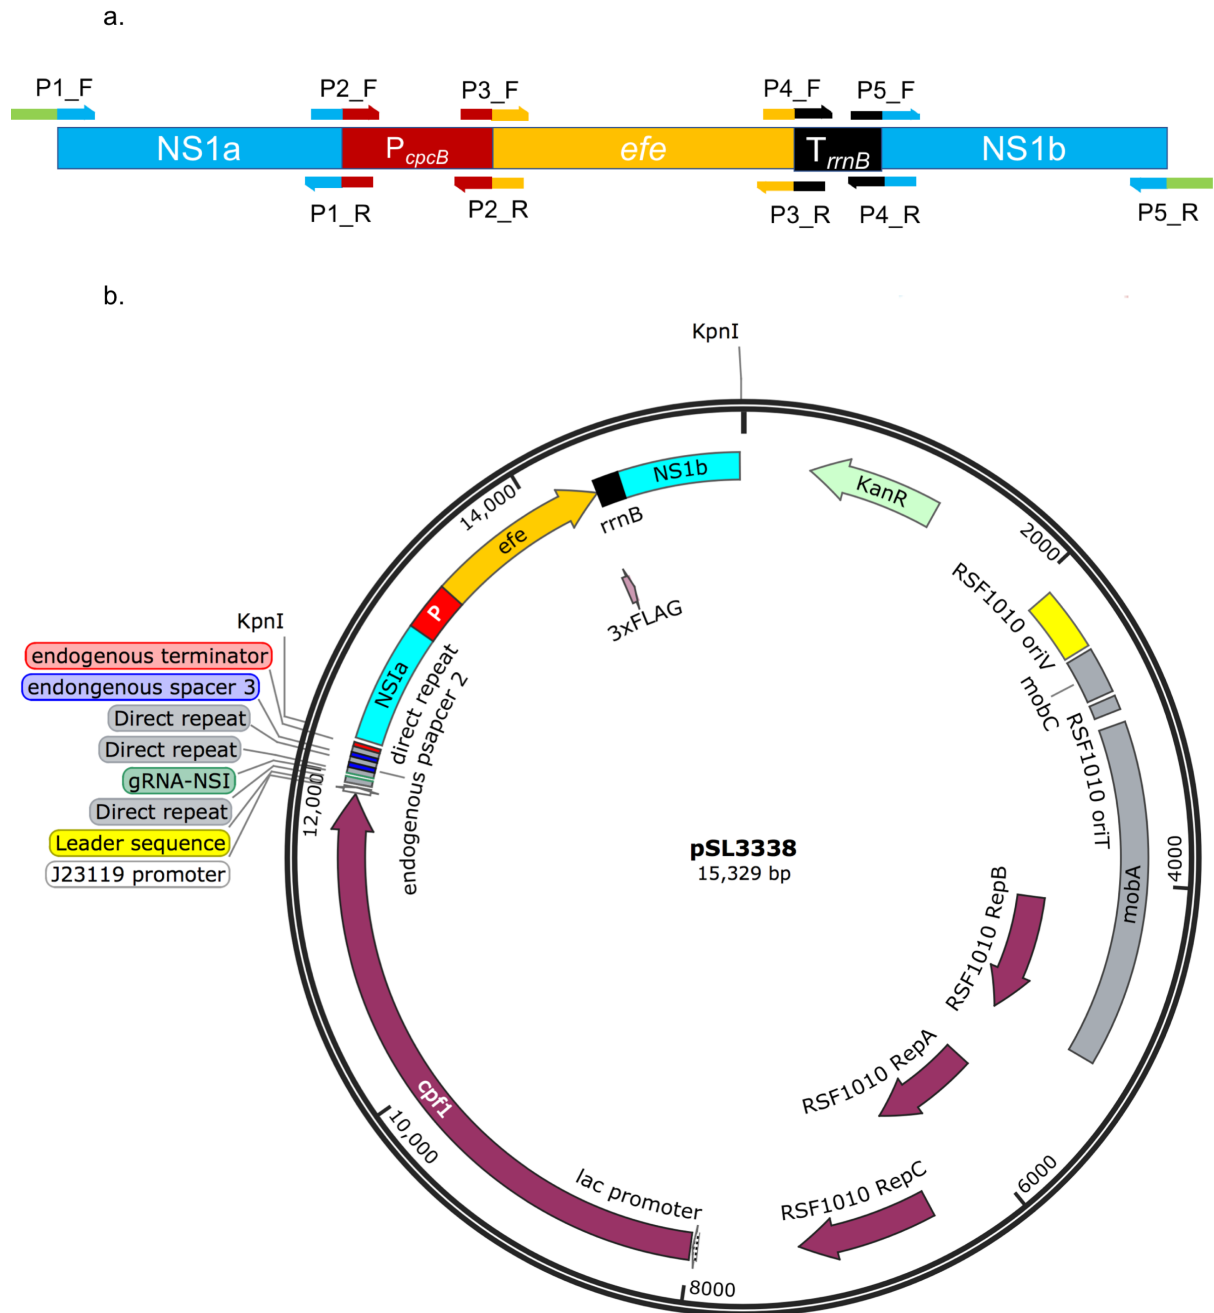

Figure S1: The plasmid map for markerless genome editing of cyanobacterial genome using CRISPR-Cpf1. (a) The schematic showing the construct assembled using Gibson Assembly along with the respective primers. The primers are represented by single-head arrow and the tail of the arrow signifies the overhang required to join different gene fragments. The colour of the primers are represented by the same colour as the genetic element to be amplified and so as the overhang in the primers. The green overhang in primer P1 and P5 represent the overhangs corresponding to the plasmid backbone in order to ligate with the CRISPR plasmid containing the gRNA at the AarI site. (b) The pSL3338 plasmid containing the gRNA targeting the NSI site of the *S. elongatus* PCC 11801 genome (gRNA-NSI) at the AarI RE site and the EFE-construct (NS1a-P<sub>cpcB</sub>-*efe*-T<sub>rmB</sub>-NS1b) at the KpnI site. Ethylene forming enzyme (*efe*).

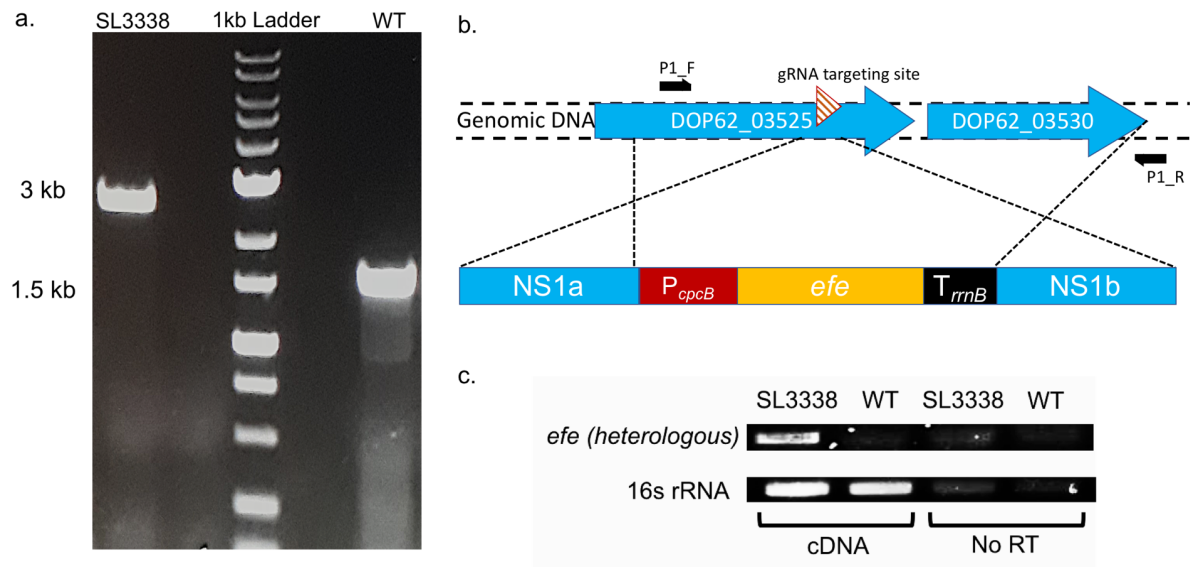

Figure S2: The Genome and RNA level confirmation: (a) the agarose gel picture showing the segregated band of heterologous ethylene forming enzyme (*efe*) gene integrated at the neutral site (NS) 1 of *S. elongatus* PCC 11801 genome. The 1.5 kb band corresponds to the intact NSI site of the wild type genome (b) The scheme showing the genomic arrangement of *S. elongatus* PCC 11801 where the construct has been inserted in to the genome. P1 represent the primers used for the genomic confirmation (c) The mRNA level of the *efe* gene observed for the recombinant strain as compared to the wild type strain. 16S rRNA primers were used as a loading control. *S. elongatus* PCC 11801: WT and *S. elongatus* PCC 11801-NSI::P<sub>cpcB</sub>-*efe*-T<sub>rnb</sub>: SL3338

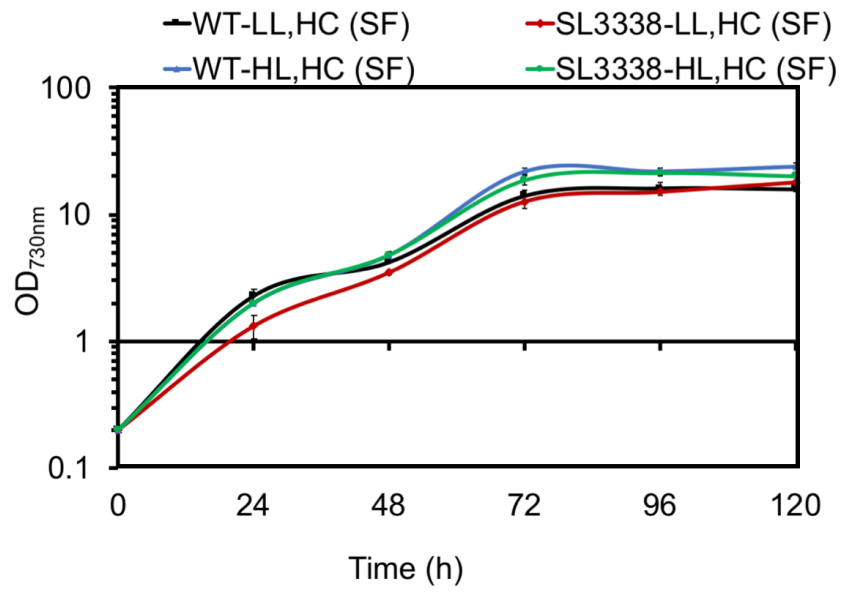

Figure S3: The biomass accumulation of the wild type and recombinant strains as a function of OD at 730nm over a period of 5 days in shake flask (SF) under HC and LL/HL. Error bars correspond to SEM of the biological replicates (n=3). *S. elongatus* PCC 11801: WT and *S. elongatus* PCC 11801-NSI::P<sub>cpcB</sub>-*efe*-T<sub>rrnB</sub>: SL3338



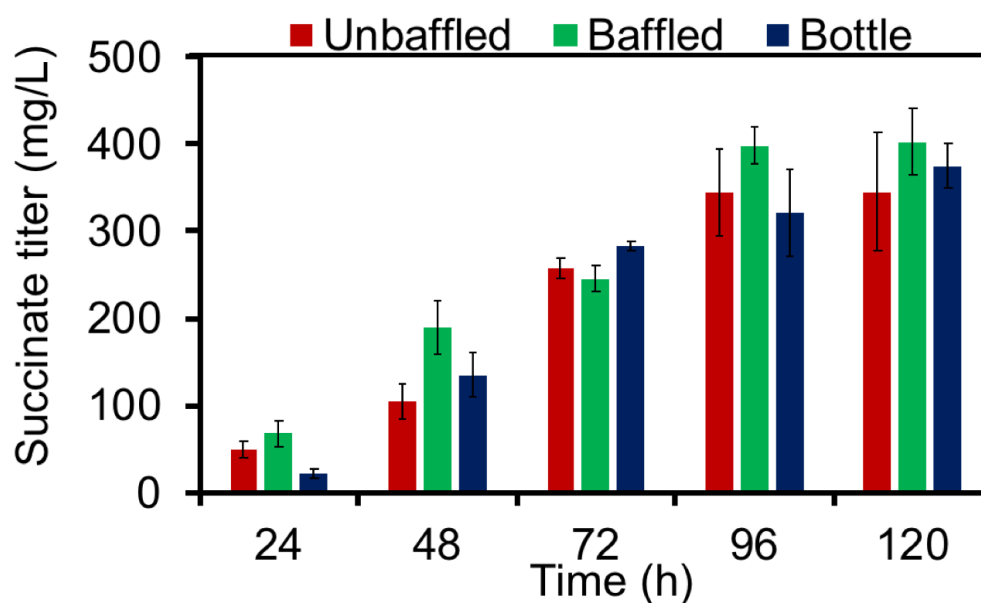

Figure S4: The effect aeration on succinate levels was studied by growing the SL3338 strain in different cultivation vessels, air-tight bottle, baffled shake flask and unbaffled shake flask under  $20 \mu\text{E} \cdot \text{m}^{-2} \cdot \text{s}^{-1}$  light in shake incubator with an agitation of 120 rpm. The experiment was done under saturated carbon levels. While for flasks 1%  $\text{CO}_2$  was used, 50 mM bicarbonate was supplemented to the medium every 24 h in the bottle. Error bars correspond to SEM of the biological replicates ( $n=3$ ).

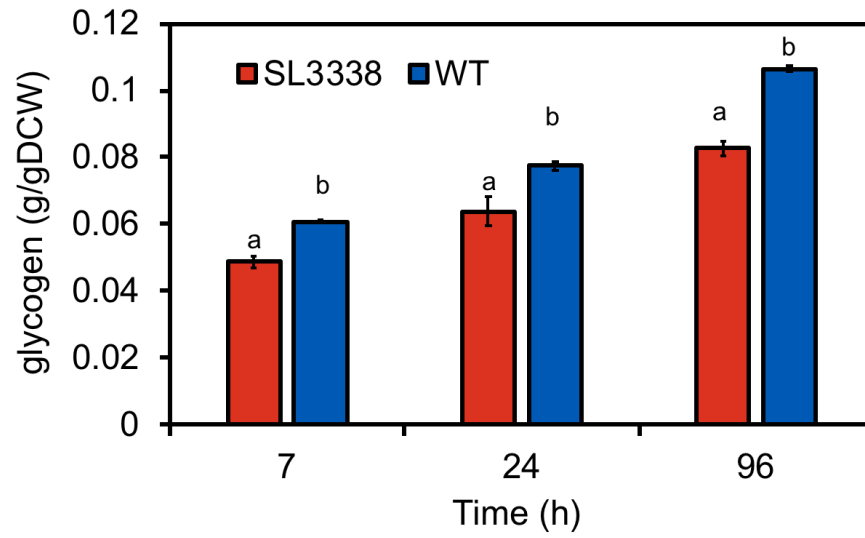

Figure S5: Estimation of glycogen accumulated in wild type and recombinant SL3338 strains under high light ( $300 \mu\text{E} \cdot \text{m}^{-2} \cdot \text{s}^{-1}$ ) and 1%  $\text{CO}_2$  in shaker incubator. *S. elongatus* PCC 11801: WT and *S. elongatus* PCC 11801-NSI::P<sub>cpcB</sub>-*efc*-T<sub>rmB</sub>: SL3338. The error bars correspond to SEM from three biological and two technical replicates (n=3) and the letters a and b denote statistically different values of  $\mu$  for each category ( $P < 0.05$ ) using T-test.

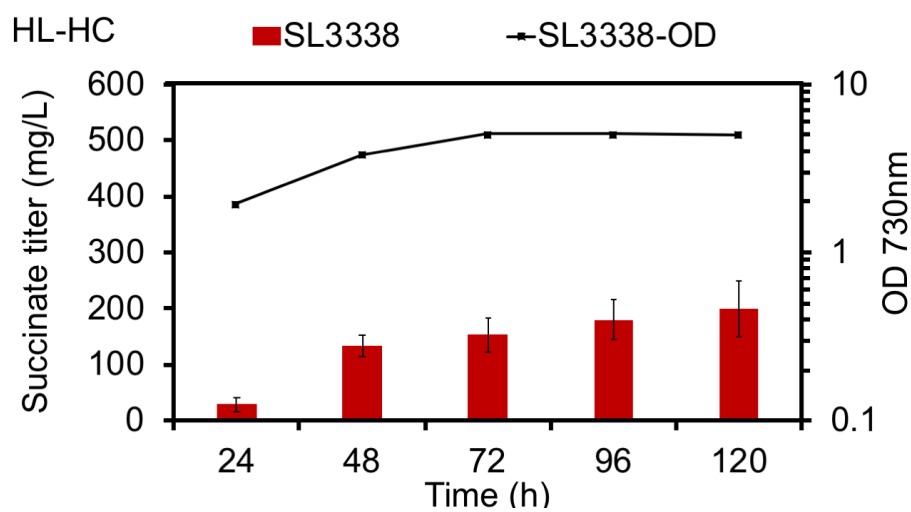

Figure S6: Estimation of succinate levels and growth profile of recombinant SL3338 strain grown in MC 1000-OD at 1% CO<sub>2</sub> bubbled under high light intensity of 300  $\mu\text{E} \cdot \text{m}^{-2} \cdot \text{s}^{-1}$ . Error bars correspond to SEM of the biological replicates (n=3). SL3338: *S. elongatus* PCC 11801-NSI::P<sub>cpcB</sub>-*efe*-T<sub>rmB</sub>.

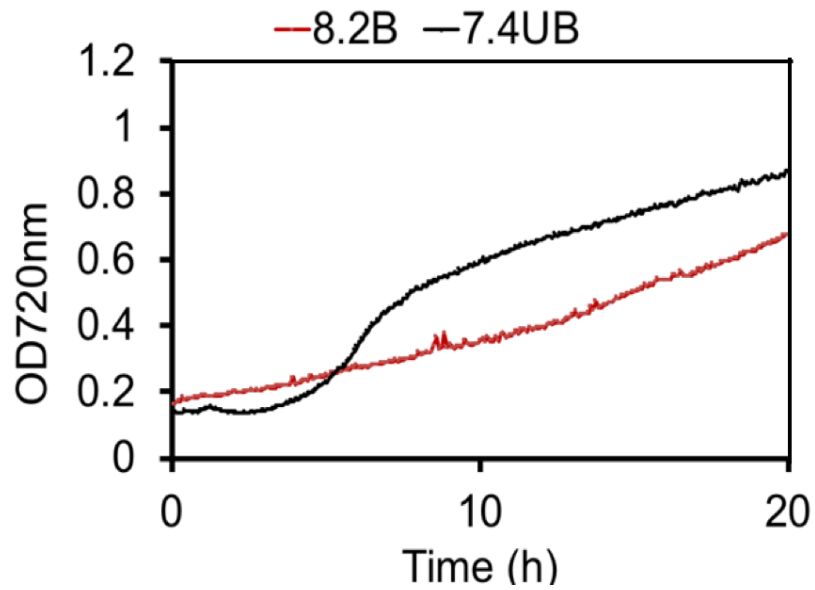

Figure S7: The comparison of the growth profile (representative) of *S. elongatus* PCC 11801 when the culture was cultivated in BG11 media with or without buffered pH. The experiment was conducted in MC 1000-OD under ambient condition,  $1000 \mu\text{E} \cdot \text{m}^{-2} \cdot \text{s}^{-1}$  and  $42^\circ\text{C}$ . While 8.2B indicate buffered BG11 media where the pH is maintained at 8.2 over the run using Tes-KOH (8.2), 7.4UB indicate unbuffered BG11 media where the initial media pH is set at 7.4 but during the run the pH is not maintained.

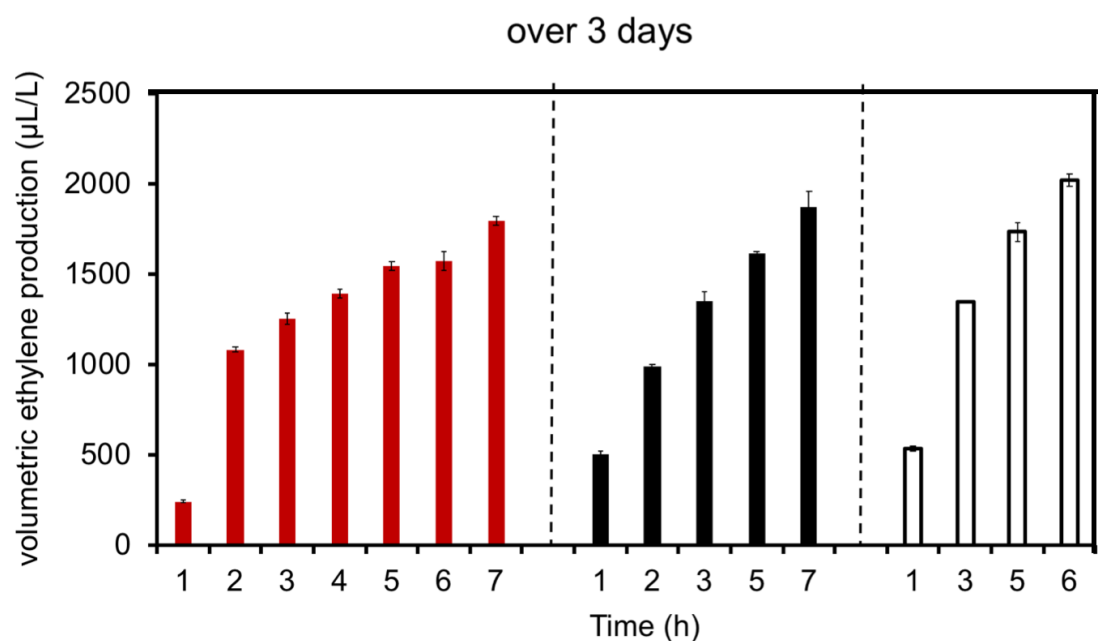

Figure S8: The biomass used for ethylene production can be re-used for at least three days without compromising its volumetric productivity. The SL3338 cells were initially grown under high light intensity and 1% CO<sub>2</sub> to an exponential OD<sub>730nm</sub>, which was used as an inoculum to incubate for ethylene production. An OD of 0.2 was incubated in air-tight bottle for 8 h and ethylene was measured every hr using GC-FID. Post 8h of incubation, these cells were re-inoculated in shake flask and grown for 16h under high light and CO<sub>2</sub> condition. These growing cells were then again used for ethylene measurement under low light condition on the 2<sup>nd</sup> day. Same procedure was repeated for the 3<sup>rd</sup> day. Error bars correspond to SEM of the biological replicates (n=3). SL3338: *S. elongatus* PCC 11801-NSI::P<sub>cpcB</sub>-*efe*-T<sub>rmB</sub>

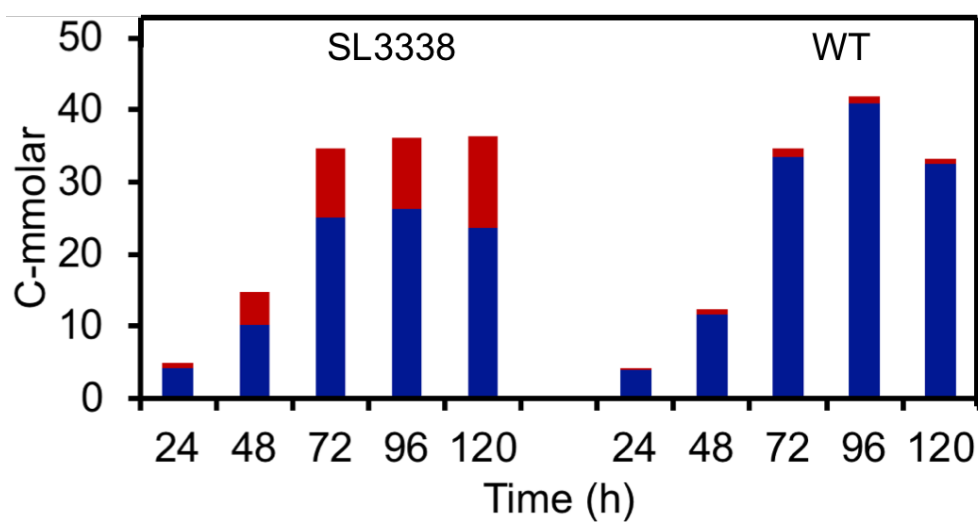

Figure S9: The carbon partitioning between biomass and product of interest when SL3338 strain was cultivated in bottle with BG11 supplemented with 50 mM bicarbonate under  $20 \mu\text{E}\cdot\text{m}^{-2}\cdot\text{s}^{-1}$ .

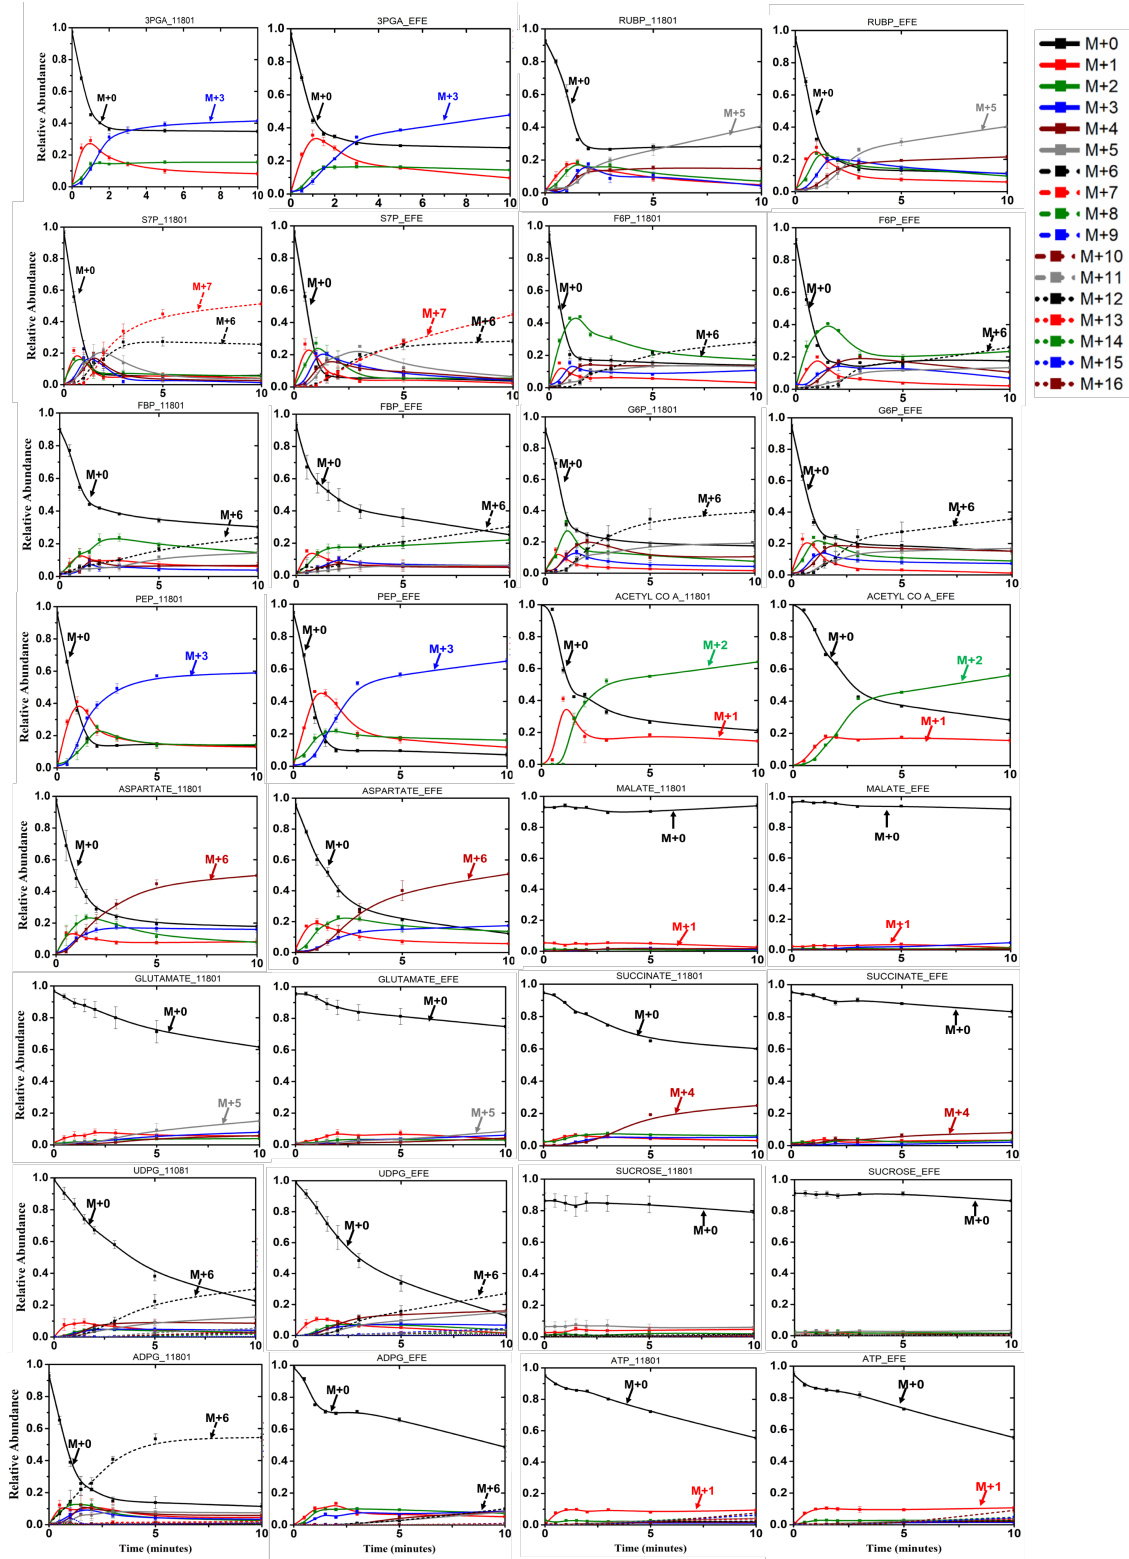

Figure S10: The mass isotopologue distribution of the metabolites under study in wild type (11801) and the recombinant *S. elongatus* PCC 11801-NSI::P<sub>cpcB-efe</sub>-T<sub>trmB</sub> (EFE) strains. The data plotted is an average of two biological replicates (n=2) with two technical replicates for each biological replicate. Error bars shown correspond to SEM from the averaged biological replicates. The abbreviations used for metabolites are Acetyl coenzyme A; ADPG: ADP-glucose; ATP: Adenosine triphosphate; FBP: fructose 1,6 biphosphate; F6P: fructose-6- phosphate; G6P: glucose- 6-phosphate; PEP: phosphoenolpyruvate; RuBP: ribulose 1,5 biphosphate; S7P: sedoheptulose-7-bisphosphate; UDPG: UDP-glucose; 2PGA: 2-phosphoglyceric acid; and 3PGA: 3-phosphoglyceric acid.

## RUBP

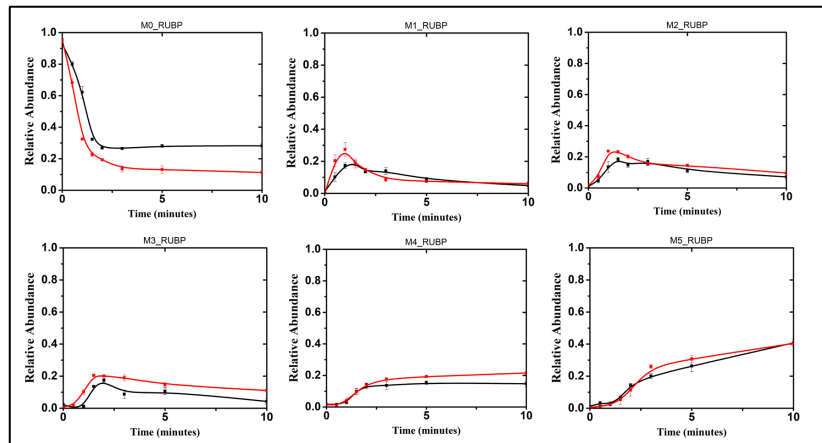

## 3-PGA

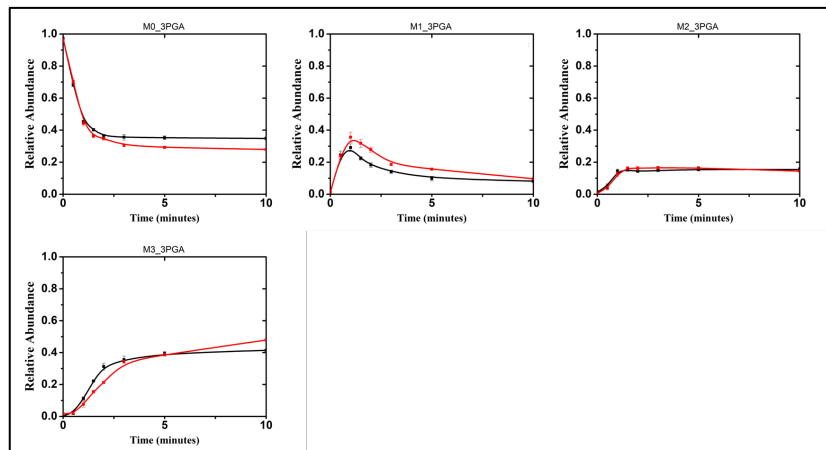

## FBP

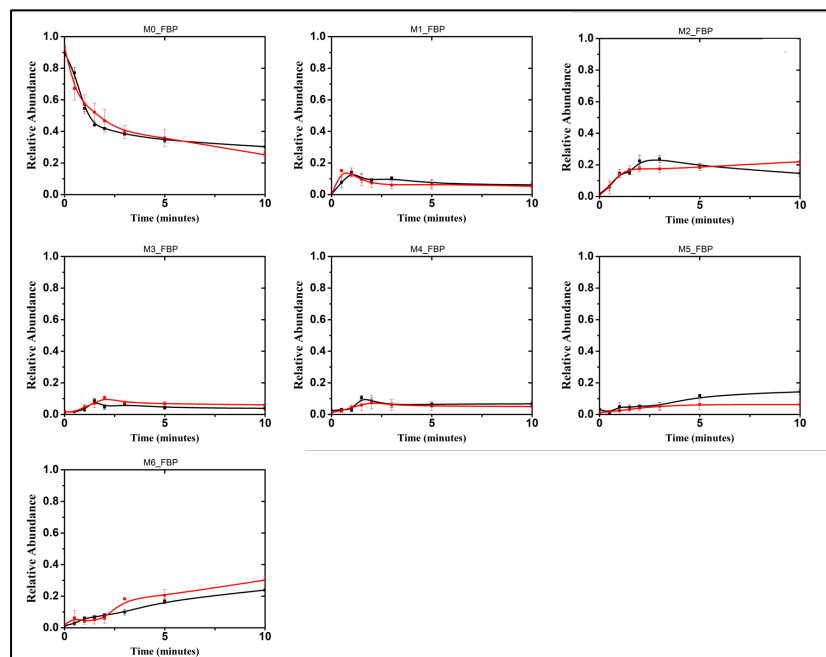



## F6P

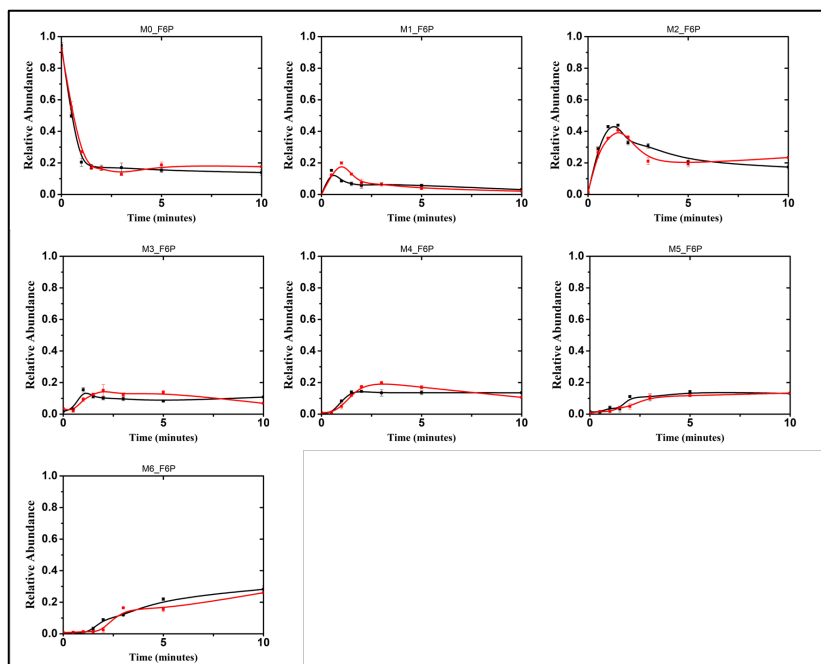

## S7P

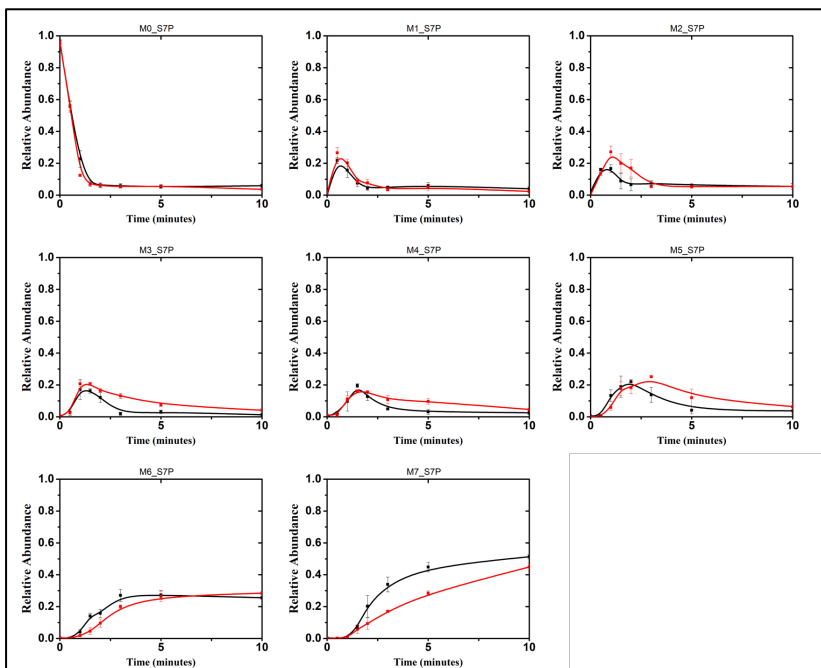

## G6P

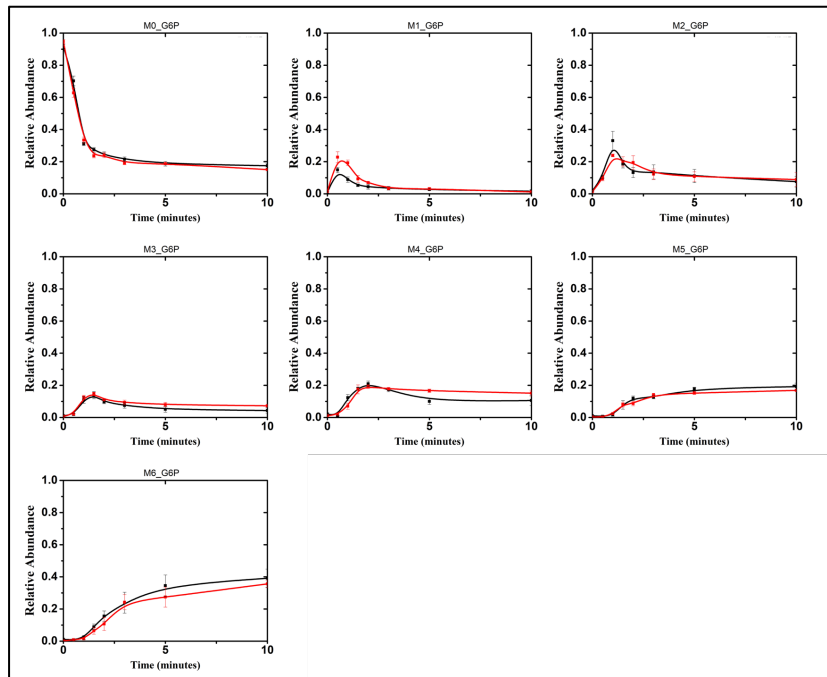

## ADPG

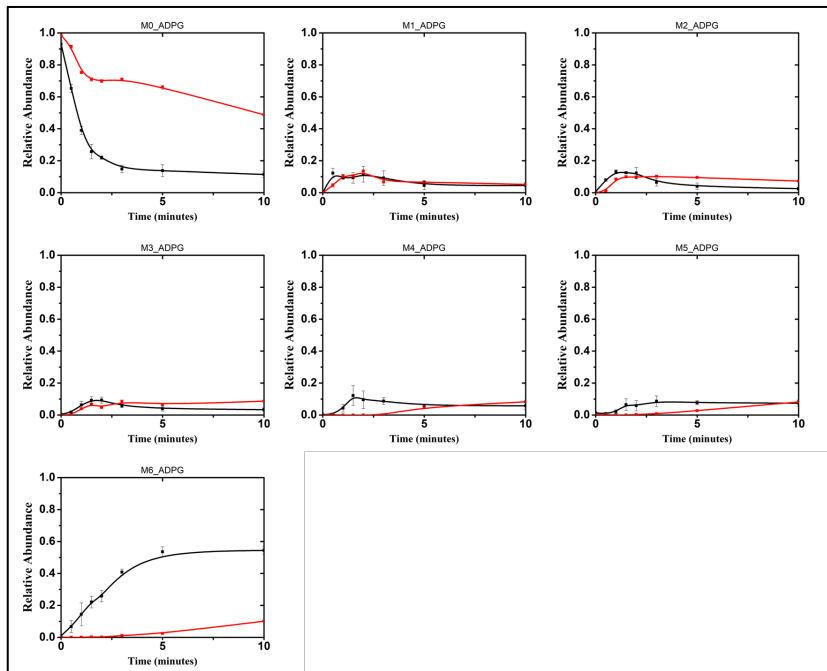

## UDPG

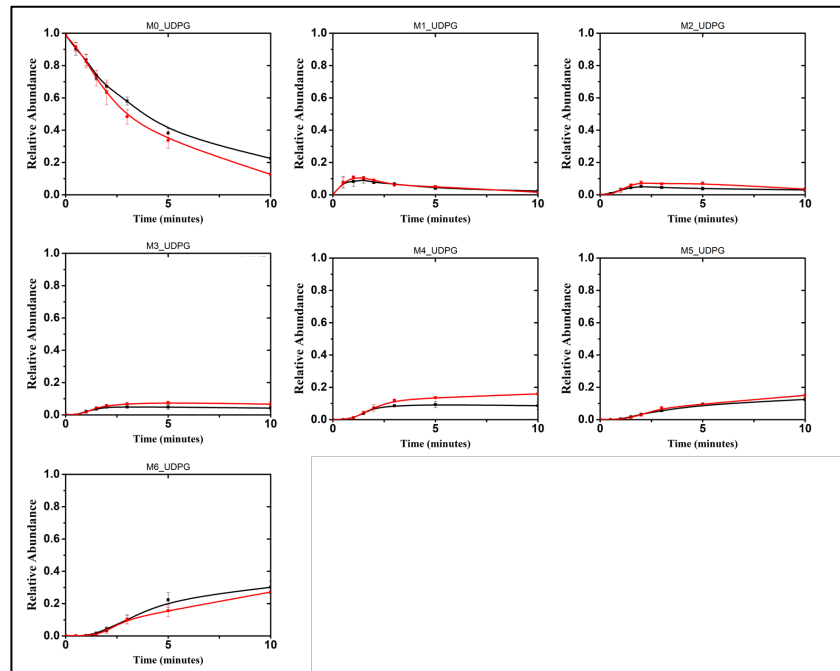

## PEP

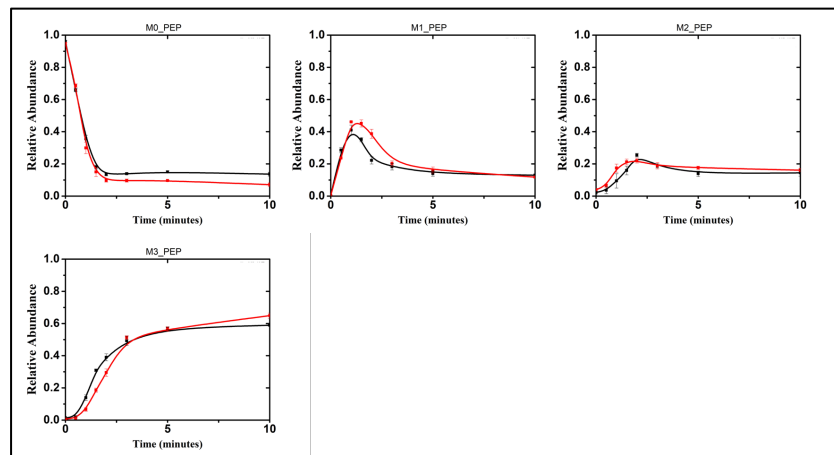

## ACETYL COA

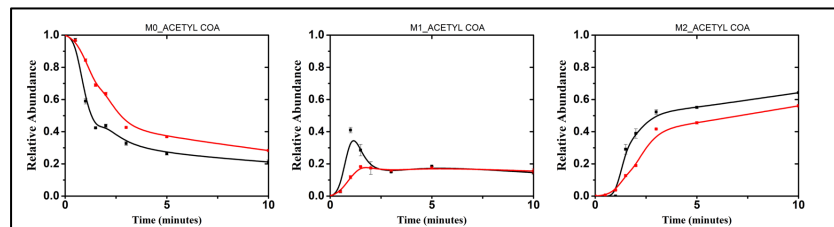

## ASPARTATE

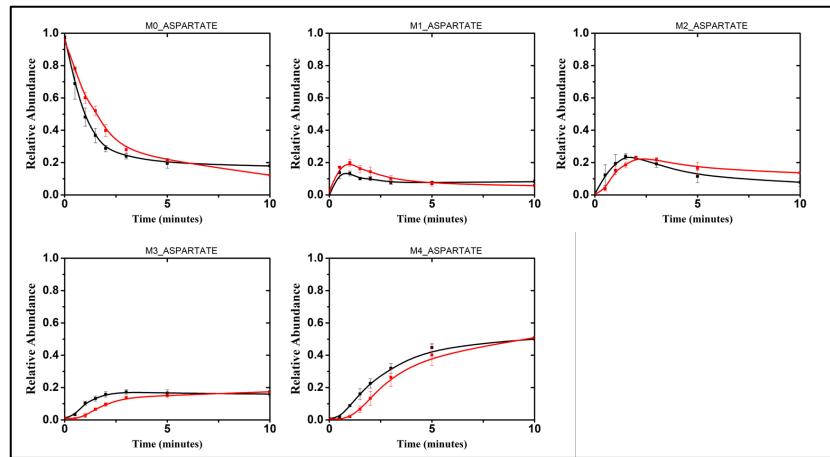

## SUCROSE

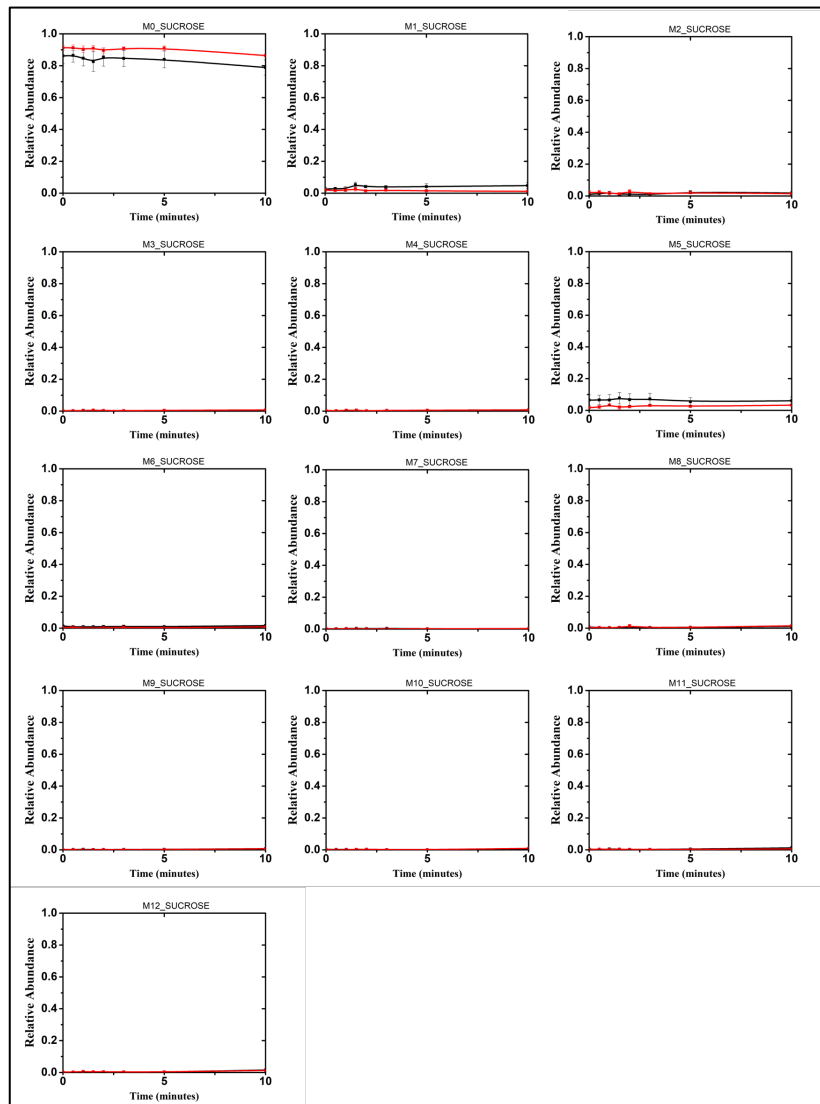

## MALATE

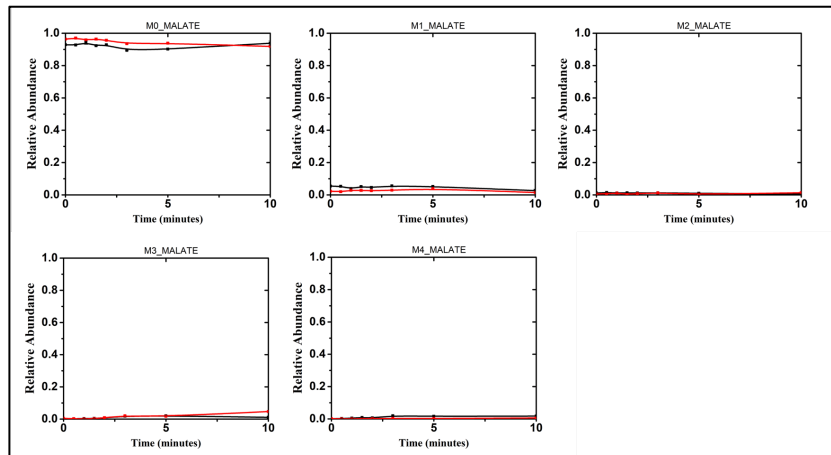

## SUCCINATE

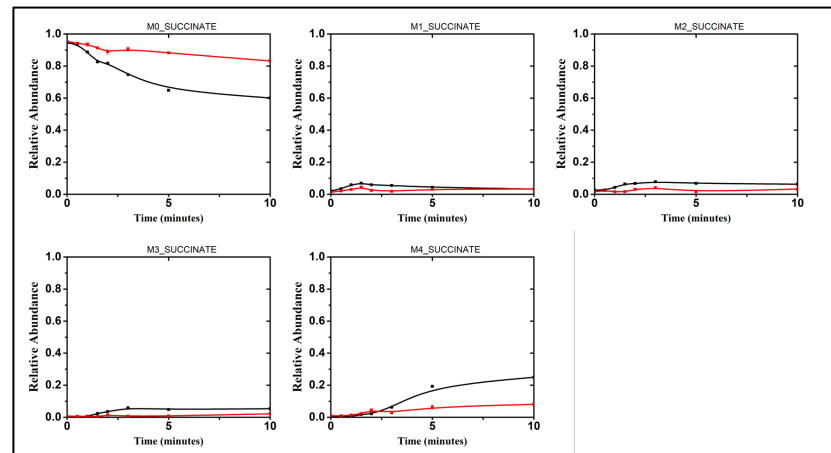

## GLUTAMATE

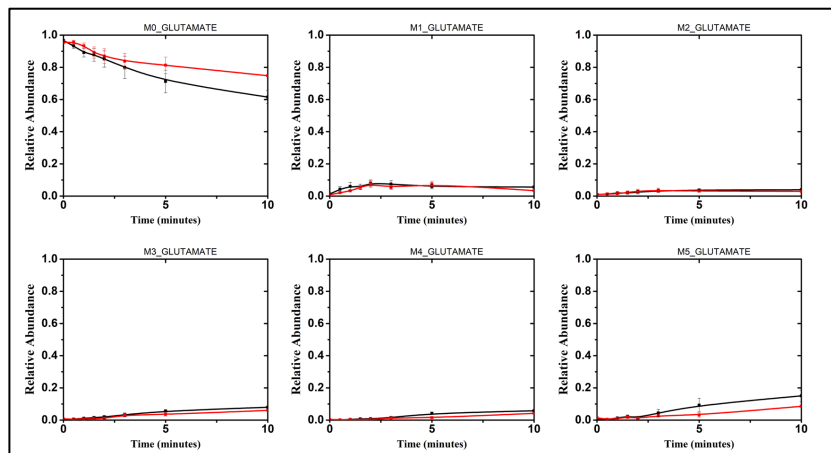

## ATP

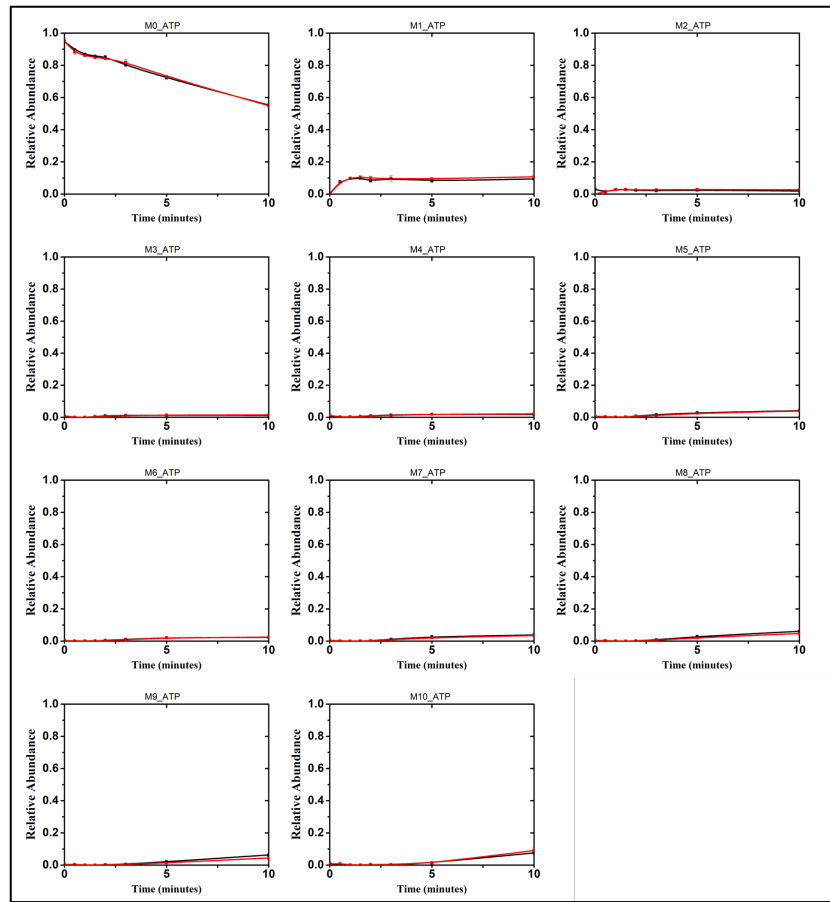

Figure S11: The comparison of mass isotopologue of metabolites under study quantified from *S. elongatus* PCC 11801 (black trace) and recombinant *S. elongatus* PCC 11801-NSI::P<sub>cpcB-efe</sub>-T<sub>rmB</sub> strain (red trace). The data plotted is an average of two biological replicates (n=2) with two technical replicates for each biological replicate. Error bars shown correspond to SEM from the averaged biological replicates. The abbreviations used for metabolites are Acetyl CoA: acetyl coenzyme A; ADPG: ADP-glucose; ATP: Adenosine triphosphate; FBP: fructose 1,6 bisphosphate; F6P: fructose-6- phosphate; G6P: glucose- 6-phosphate; PEP: phosphoenolpyruvate; RuBP: ribulose 1,5 bisphosphate; S7P: sedoheptulose-7-bisphosphate; UDPG: UDP-glucose; 2PGA: 2-phosphoglyceric acid; and 3PGA: 3-phosphoglyceric acid.

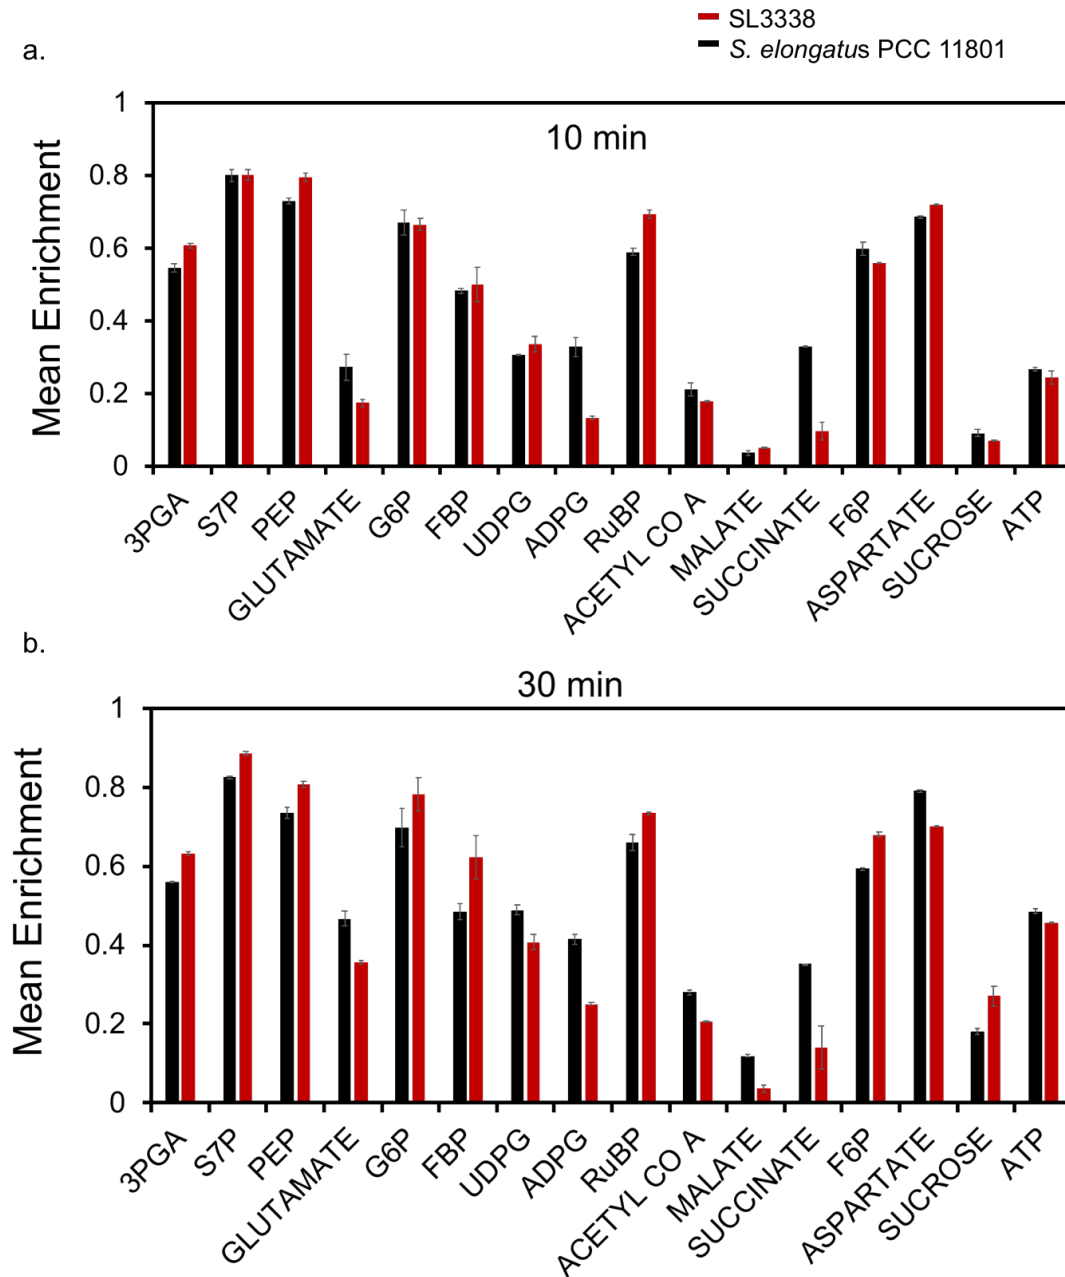

Figure S12: Comparison of mean enrichment of metabolites between the wild type and recombinant strains after (a) 10 min and (b) 30 mins. While the red bar indicate the recombinant, black is for wild type strain. Average of two biological replicates (each biological replicate having two technical replicates) was plotted. Error bars shown correspond to the standard error of mean (SEM) from the replicates (n=2). The abbreviations are provided in Figure S10. The SL3338 strain: *S. elongatus* PCC 11801-NSI::P<sub>cpcB</sub>-*efe*-T<sub>rmB</sub>.

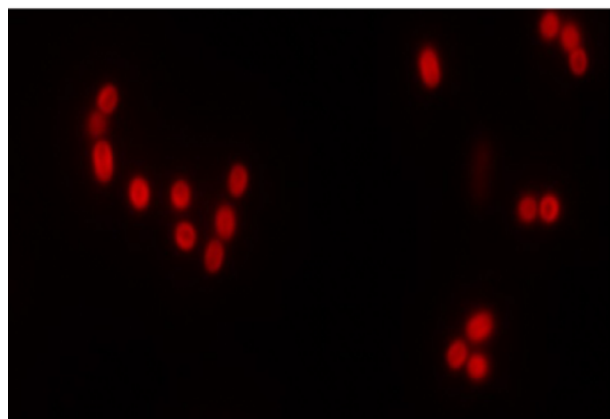

*S. elongatus* PCC 11801

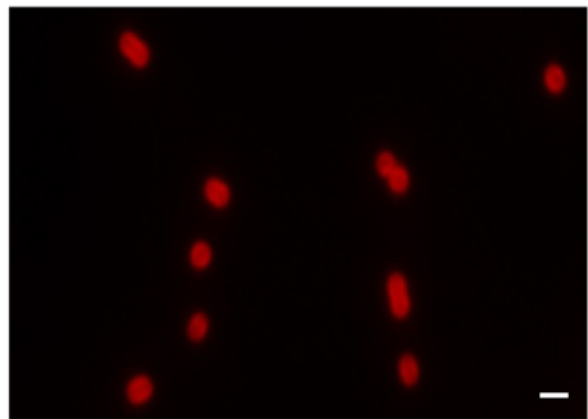

SL3338

Figure S13: The microscopic image of the wild type and recombinant strains. No size or morphological difference was identified. SL3338: *S. elongatus* PCC 11801-NSI::P<sub>cpcB</sub>-*eFe*-T<sub>rmB</sub>



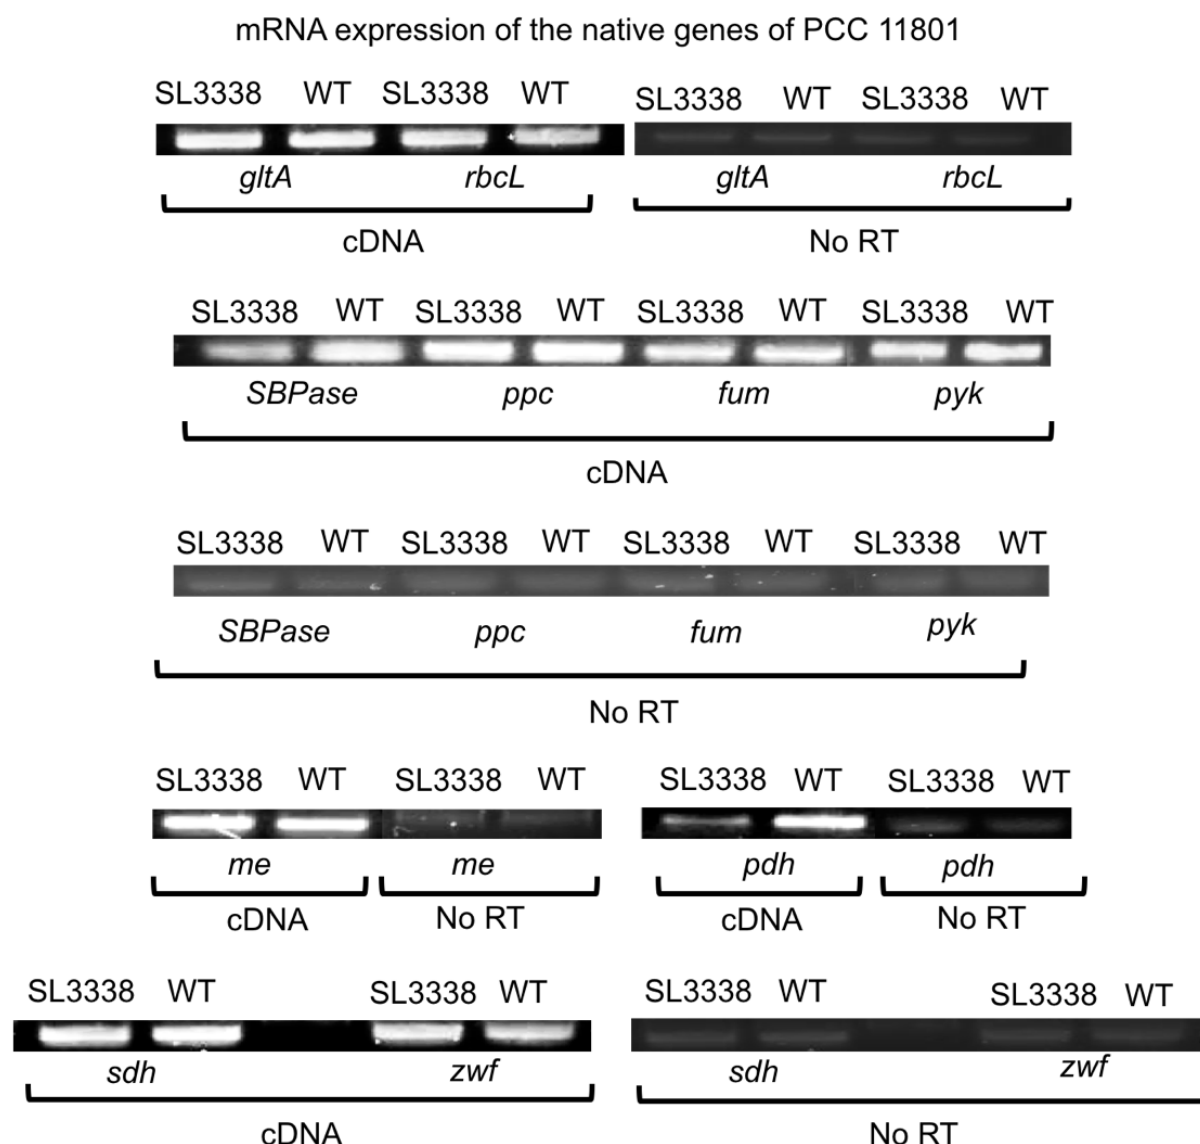

Figure S14: Qualitative RT-PCR was performed for both the wild type and recombinant strains showing the mRNA levels of the native genes present in the strains. The cDNA was prepared from the total RNA extracted from the strains and the primers specific for the gene was designed such that 200 bp was amplified in 30 PCR cycles. 16S rRNA was used as a loading control (Figure S2b). The abbreviations are: SL3338: *S. elongatus* PCC 11801-NSI::P<sub>cpcB-efe-T<sub>rmB</sub></sub> strain; WT: wild type *S. elongatus* PCC 11801; No RT: No Reverse Transcriptase enzyme was added to the PCR mixture and this acted as the ; *gltA*: Citrate synthase; *rbcL*: ribulose-bis-phosphate carboxylase/oxygenase large subunit; *SBPase*: sedoheptulose/fructose biphosphatases; *ppc*: phosphoenolpyruvate carboxylase; *fum*: fumarase; *pyk*: pyruvate kinase; *me*: maleic enzyme; *sdh*: succinate dehydrogenase; *zwf*: Glucose-6-phosphate 1-dehydrogenase; *pdh*: pyruvate dehydrogenase.

Table S1: The list of primers employed in the study.

| Primer description | Primer sequence                                          |
|--------------------|----------------------------------------------------------|
| gRNA-NSI-fw        | agatcagaagctggagtctctg                                   |
| gRNA-NSI-rv        | agacagcagagactccagcttctg                                 |
| NS1a_Left          | cattttttgtctagctttaatgcggtagttGGTACCcaacgcctattccaagggcg |
| NS1b_Right         | gcccggattacagatcctctagatcgacGGTACCctctctgaggggatgcagtgct |
| NS1b_left          | ggctcagtcgaaagactgggccttctatcgggcaccgtaccgga             |
| NS1a_cpc_Right     | cggccacaagattcgctaaaaattgtgcaggcttctgccagtcgctt          |
| cpcB_left          | aagcgactggcagaagcctgcacaatttttagcgaatcttgggccg           |
| cpcB_right         | caaaggtctgcaggttggcattcaaccagtctcctgttctcgactttat        |
| efe_cpc_left       | ataaaagtcgagaacaggagactggttgaatgaccaacctgcagaccttg       |
| efe_right          | gcgctactgccgccaggcactacttatcgtcgtcatccttgtaataatcg       |
| rrnB_left          | caaggatgacgacgataagtagtgcctggcggcagtagcgc                |
| rrnB_right         | tccggtacggtgcccgatagaaggcccagcttctcgactgagcc             |
| RT-efe-fw          | attggcgctcacaccgatta                                     |
| RT-efe-rv          | tatcaccgggaaacacggtc                                     |
| NSI-CF-fw          | caacgcctattccaagggcg                                     |
| NSI-CF-rv          | ctctctgaggggatgcagtgt                                    |
| RT-gltA_11801-fw   | gatccctacgctgtatgcgc                                     |
| RT-gltA_11801-rv   | ctgcccgtggatctttgact                                     |
| RT-rbcL_11801-fw   | cgccaaatcgctgctcaaat                                     |
| RT-rbcL_11801-rv   | agccagcaacgcggatatag                                     |
| RT-sbpase_11801-fw | gcgggctatgtcctctatgg                                     |
| RT-sbpase_11801-rv | tccggatgtactggcgata                                      |
| RT-ppc_11801-fw    | ggaaatccacaaggcccaga                                     |
| RT-ppc_11801-rv    | aggcagggcatatttcgagg                                     |
| RT-fum_11801-fw    | gcagtcacaaatggcagacc                                     |
| RT-fum_11801-rv    | tgccattaacgctgggacaa                                     |
| RT-pyk_11801-fw    | cttccatctgctcgatcgct                                     |
| RT-pyk_11801-rv    | atctgtccgtcaaagccctg                                     |
| RT-me_11801-fw     | gtcgagacgatgaagcggat                                     |
| RT-me_11801-rv     | cgtacctgcgacagggattt                                     |
| RT-sdh_11801-fw    | gatgccttcgacctgact                                       |
| RT-sdh_11801-rv    | gcactgcgatcgacgactaa                                     |

|                 |                      |
|-----------------|----------------------|
| RT-zwf_11801-fw | ccggcgtttcacctcaaag  |
| RT-zwf_11801-rv | gatggtcgataactggcgct |
| RT-pdh_11801-fw | gccttatccaacgggcagat |
| RT-pdh_11801-rv | tgaacactcccaacgactgg |
| RT-16s_11801-fw | agccacactgggactgagac |
| RT-16s_11801-rv | ttccctgagaaaaggggttt |

---

Table S2: Detailed comparison of succinate and ethylene productivity reported in the literature for different cyanobacteria

| SL. No. | Year | Organisms                         | Genetic Modifications                                                               | Growth/Production Condition                            | Reported Titers    | OD                  | peak Ethylene productivity (μmole/g/h) | peak Succinate productivity (mg/g/h) | Ref                      |
|---------|------|-----------------------------------|-------------------------------------------------------------------------------------|--------------------------------------------------------|--------------------|---------------------|----------------------------------------|--------------------------------------|--------------------------|
| 1       | 2013 | <i>Synechocystis</i> sp. PCC 6803 | <i>2Xefe</i>                                                                        | 5% CO <sub>2</sub> , 20 mM NaHCO <sub>3</sub> , 600 μE | 250 μl/l/h/OD      | -                   | 44                                     | ---                                  | (Ungerer et al., 2012)   |
| 2       | 2015 | <i>Synechocystis</i> sp. PCC 6803 | <i>1Xefe</i> , modified RBS                                                         | 5% CO <sub>2</sub> , 20 mM NaHCO <sub>3</sub> , 50 μE  | 718 μl/l/h/OD      | -                   | 128.21                                 | ---                                  | (Xiong et al., 2015)     |
| 3       | 2015 | <i>Synechocystis</i> sp. PCC 6803 | *                                                                                   | 5% CO <sub>2</sub> , 30 μE                             | 9700 μl/l/h        | 20                  | 86.61                                  | ---                                  | (Zhu et al., 2015)       |
| 4       | 2015 | <i>Synechocystis</i> sp. PCC 6803 | $\Delta$ <i>ackA</i> and O.E.( <i>SigE</i> )                                        | Dark anaerobic                                         | 120 mg/L in 5 days | 20                  | ---                                    | 0.2                                  | (Osanai et al., 2015)    |
| 5       | 2016 | <i>S. elongatus</i> PCC 7942      | O.E.( <i>gabD/kgd/ppc/gltA</i> )                                                    | 30μE, 50 mM NaHCO <sub>3</sub>                         | 80 mg/L/day        | 1.25                | ---                                    | 10.67                                | (Lan and Wei, 2016)      |
| 6       | 2017 | <i>Synechocystis</i> sp. PCC 6803 | #                                                                                   | Air, 50-100 μE                                         | 2463 μl/l/h/OD     | -                   | 439                                    | ---                                  | (Mo et al., 2017)        |
| 7       | 2017 | <i>Synechocystis</i> sp. PCC 6803 | slr0168:: P <sub>trc</sub> -Rbs30- <i>efe</i> -Km <sup>r</sup>                      | 1% CO <sub>2</sub> , 220 μE                            | 443 μl/l/h         | 5                   | 15.82                                  | ---                                  | (Veetil et al., 2017)    |
| 8       | 2018 | <i>Synechocystis</i> sp. PCC 6803 | O.E.( <i>ppc</i> ) and $\Delta$ <i>ackA</i>                                         | Dark anaerobic                                         | 1.8 g/L in 72 h    | 25 <sup>a</sup> g/L | ---                                    | 1.0                                  | (Hasunuma et al., 2018)  |
| 9       | 2019 | <i>S. elongatus</i> PCC 7942      | NSI:: P <sub>trc</sub> - <i>efe</i> -T <sub>rrnB</sub>                              | 1% CO <sub>2</sub> , 50 μE                             | 140 μl/l/h/OD      | -                   | 25                                     | ---                                  | (Carbonell et al., 2019) |
| 10      | 2020 | <i>Synechocystis</i> sp. PCC 6803 | P <sub>hrsB</sub> - <i>efe</i> , O.E.( <i>2Xppc</i> , <i>ppsA</i> <sub>7002</sub> ) | 50 mM NaHCO <sub>3</sub> , 20 μE                       | 20 μg/ml/OD /day   | -                   | 118.84                                 | ---                                  | (Durall et al., 2020)    |
| 11      |      | <i>S. elongatus</i> PCC 11801     | NSI::P <sub>pcB300</sub> - <i>efe</i> -T <sub>rrnB</sub>                            | LL-HC <sup>b</sup>                                     | -                  | -                   | 338.26                                 | 121.1                                | This study               |

<sup>a</sup> biomass used

<sup>b</sup> 20μE light with 1% CO<sub>2</sub> (chamber)in shake flask, or 1% CO<sub>2</sub> (bubbled) in MC 1000-OD or 50 mM NaHCO<sub>3</sub> in air-tight bottle

\* slr0168::Sp<sup>r</sup>-P<sub>pcB-efe</sub>/slr1981::Km<sup>r</sup>-P<sub>pcB-efe</sub>/slr0370::Cm<sup>r</sup>-P<sub>pcB-efe</sub>/phaAB::Gm<sup>r</sup>-p<sub>pcB-kgfP</sub>

# slr0168::Sp<sup>r</sup>-P<sub>pcB-efe</sub>/slr1981::Km<sup>r</sup>-P<sub>pcB-efe</sub>/slr0370::Cm<sup>r</sup>-P<sub>pcB-efe</sub>/slr1423::Gm<sup>r</sup>-p<sub>pcB-efe</sub>

Table S3: The Quantum efficiency (Fv/Fm) of the wild type and recombinant strains measured using Phyto-PAM (Walz, Germany). SL3338: *S. elongatus* PCC 11801-NSI::P<sub>cpcB</sub>-*efe*-T<sub>rrnB</sub>. The data is from three biological replicates (each biological replicate having three technical replicates). Error bars shown correspond to SEM from the averaged biological replicates (n=3).

|         | WT-11801  | SL3338    | P-value |
|---------|-----------|-----------|---------|
| Fv/Fm   | 0.52±0.12 | 0.47±0.09 | 0.49    |
| ETR max | 25.9±1.7  | 21.1±3.5  | 0.288   |

Table S4: List of metabolites analyzed in the study

|    | Abbreviation | Compound Name                   | Formula                                                         | m/z Da | RT (min) | KEGG ID |
|----|--------------|---------------------------------|-----------------------------------------------------------------|--------|----------|---------|
| 1  | GLY          | Glycine                         | C <sub>2</sub> H <sub>5</sub> NO <sub>2</sub>                   | 74.03  | 1.1      | C00037  |
| 2  | GABA         | Gamma-aminobutyric acid         | C <sub>4</sub> H <sub>9</sub> NO <sub>2</sub>                   | 102.06 | 6.0      | C00334  |
| 3  | SUCC         | Succinate                       | C <sub>4</sub> H <sub>6</sub> O <sub>4</sub>                    | 117.02 | 13.3     | C00042  |
| 4  | Pro-GLU      | Proglutamic acid                | C <sub>5</sub> H <sub>7</sub> NO <sub>3</sub>                   | 128.04 | 6.0      | C01879  |
| 5  | ASP          | Aspartate                       | C <sub>4</sub> H <sub>7</sub> NO <sub>4</sub>                   | 132.03 | 6.0      | C00049  |
| 6  | GLN          | Glutamine                       | C <sub>5</sub> H <sub>10</sub> N <sub>2</sub> O <sub>3</sub>    | 145.09 | 1.2      | C00064  |
| 7  | GLU          | Glutamate                       | C <sub>5</sub> H <sub>9</sub> NO <sub>4</sub>                   | 146.05 | 5.7      | C00025  |
| 8  | PEP          | Phosphoenolpyruvate             | C <sub>3</sub> H <sub>5</sub> O <sub>6</sub> P                  | 166.98 | 15.0     | C00074  |
| 9  | 3PGA         | 3-phosphoglycerate              | C <sub>3</sub> H <sub>7</sub> O <sub>7</sub> P                  | 184.99 | 14.7     | C00197  |
| 10 | N-Acetyl GLU | N-acetylglutamate               | C <sub>7</sub> H <sub>11</sub> NO <sub>5</sub>                  | 188.06 | 13.6     | C00624  |
| 11 | G6P          | Glucose-6-phosphate             | C <sub>6</sub> H <sub>13</sub> O <sub>9</sub> P                 | 259.02 | 10.6     | C00668  |
| 12 | F6P          | Fructose-6-phosphate            | C <sub>6</sub> H <sub>13</sub> O <sub>9</sub> P                 | 259.02 | 10.9     | C00085  |
| 13 | 6PG          | 6-phosphogluconate              | C <sub>6</sub> H <sub>13</sub> O <sub>10</sub> P                | 274.98 | 14.7     | C04442  |
| 14 | S7P          | Sedoheptulose-7-phosphate       | C <sub>7</sub> H <sub>15</sub> O <sub>10</sub> P                | 289.03 | 10.9     | C05382  |
| 15 | N-Ac-Glu-6-P | N-acetylglucosamine-6-phosphate | C <sub>8</sub> H <sub>16</sub> NO <sub>9</sub> P                | 300.03 | 11.7     | C00357  |
| 16 | RuBP         | Ribulose 1,5 bisphosphate       | C <sub>5</sub> H <sub>12</sub> O <sub>11</sub> P <sub>2</sub>   | 308.98 | 15.2     | C01182  |
| 17 | Deoxy-TMP    | deoxy-thymidine monophosphate   | C <sub>10</sub> H <sub>15</sub> N <sub>2</sub> O <sub>8</sub> P | 321.07 | 12.9     | C00364  |
| 18 | CMP          | Cytidine monophosphate          | C <sub>9</sub> H <sub>14</sub> N <sub>3</sub> O <sub>8</sub> P  | 322.05 | 11.6     | C00055  |
| 19 | UMP          | Uridine monophosphate           | C <sub>9</sub> H <sub>13</sub> N <sub>2</sub> O <sub>9</sub> P  | 323.03 | 11.9     | C00105  |
| 20 | FBP          | Fructose-1,6-bisphosphate       | C <sub>6</sub> H <sub>14</sub> O <sub>12</sub> P <sub>2</sub>   | 338.96 | 15.1     | C05378  |
| 21 | SUC          | Sucrose                         | C <sub>12</sub> H <sub>22</sub> O <sub>11</sub>                 | 341.11 | 1.5      | C00089  |
| 22 | AMP          | Adenosine monophosphate         | C <sub>10</sub> H <sub>14</sub> N <sub>5</sub> O <sub>7</sub> P | 346.06 | 13.7     | C00020  |
| 23 | IMP          | Inosine monophosphate           | C <sub>10</sub> H <sub>13</sub> N <sub>4</sub> O <sub>8</sub> P | 347.05 | 12.1     | C00130  |
| 24 | SBP          | Sedoheptulose-1,7-bisphosphate  | C <sub>7</sub> H <sub>16</sub> O <sub>13</sub> P <sub>2</sub>   | 369.01 | 15.2     | C00447  |
| 25 | GMP          | Guanosine monophosphate         | C <sub>10</sub> H <sub>14</sub> N <sub>5</sub> O <sub>8</sub> P | 362.02 | 12.4     | C00144  |
| 26 | XMP          | Xanthosine monophosphate        | C <sub>10</sub> H <sub>13</sub> N <sub>4</sub> O <sub>9</sub> P | 363.04 | 14.8     | C00655  |

|    |                           |                                                           |                                                                                 |                 |      |        |
|----|---------------------------|-----------------------------------------------------------|---------------------------------------------------------------------------------|-----------------|------|--------|
| 27 | CDP                       | Cytidine diphosphate                                      | C <sub>9</sub> H <sub>15</sub> N <sub>3</sub> O <sub>11</sub> P <sub>2</sub>    | 402.04          | 13.7 | C00112 |
| 28 | UDP                       | Uridine diphosphate                                       | C <sub>9</sub> H <sub>14</sub> N <sub>2</sub> O <sub>12</sub> P <sub>2</sub>    | 403.00          | 14.8 | C00015 |
| 29 | SUCROSE-6-P               | Sucrose-6-phosphate                                       | C <sub>12</sub> H <sub>23</sub> O <sub>14</sub> P                               | 421.08          | 10.5 | C16688 |
| 30 | ADP                       | Adenosine diphosphate                                     | C <sub>10</sub> H <sub>15</sub> N <sub>5</sub> O <sub>10</sub> P <sub>2</sub>   | 426.02          | 14.9 | C00008 |
| 31 | GDP                       | Guanosine diphosphate                                     | C <sub>10</sub> H <sub>15</sub> N <sub>5</sub> O <sub>11</sub> P <sub>2</sub>   | 442.02          | 14.7 | C01228 |
| 32 | ATP                       | Adenosine triphosphate                                    | C <sub>10</sub> H <sub>16</sub> N <sub>5</sub> O <sub>13</sub> P <sub>3</sub>   | 505.99          | 15.3 | C00002 |
| 33 | GTP                       | Guanosine triphosphate                                    | C <sub>10</sub> H <sub>16</sub> N <sub>5</sub> O <sub>14</sub> P <sub>3</sub>   | 521.99          | 15.2 | C00044 |
| 34 | dTDP-<br>rhamnose         | deoxy-TDP-rhamnose                                        | C <sub>16</sub> H <sub>26</sub> N <sub>2</sub> O <sub>15</sub> P <sub>2</sub>   | 547.08          | 14.1 | C03319 |
| 35 | UDPX                      | UDP-xylose                                                | C <sub>14</sub> H <sub>22</sub> N <sub>2</sub> O <sub>16</sub> P <sub>2</sub>   | 535.04          | 13.1 | C00190 |
| 36 | UDPG                      | UDP-glucose                                               | C <sub>15</sub> H <sub>24</sub> N <sub>2</sub> O <sub>17</sub> P <sub>2</sub>   | 565.05          | 13.2 | C00029 |
| 37 | UDPGluc                   | UDP-glucuronate                                           | C <sub>15</sub> H <sub>22</sub> N <sub>2</sub> O <sub>18</sub> P <sub>2</sub>   | 579.03          | 15.0 | C00167 |
| 38 | ADPG                      | ADP-glucose                                               | C <sub>16</sub> H <sub>25</sub> N <sub>5</sub> O <sub>15</sub> P <sub>2</sub>   | 588.08          | 14.1 | C00498 |
| 39 | GDP-fucose                | GDP-fucose                                                | C <sub>16</sub> H <sub>25</sub> N <sub>5</sub> O <sub>15</sub> P <sub>2</sub>   | 588.08          | 13.6 | C00325 |
| 40 | GDP-mannose               | GDP-mannose                                               | C <sub>16</sub> H <sub>25</sub> N <sub>5</sub> O <sub>16</sub> P <sub>2</sub>   | 604.07          | 13.1 | C00096 |
| 41 | UDP-GlcNAc                | UDP-N-acetyl-glucosamine                                  | C <sub>17</sub> H <sub>27</sub> N <sub>3</sub> O <sub>17</sub> P <sub>2</sub>   | 606.08          | 13.1 | C00043 |
| 42 | GSSG                      | Oxidized glutathione                                      | C <sub>20</sub> H <sub>32</sub> N <sub>6</sub> O <sub>12</sub> S <sub>2</sub>   | 611.15          | 12.4 | C00127 |
| 43 | CMP-NAc-<br>neuramininate | Cytidine<br>monophosphate N-<br>acetylneuraminic acid     | C <sub>20</sub> H <sub>31</sub> N <sub>4</sub> O <sub>16</sub> P                | 613.15          | 12.5 | C00128 |
| 44 | ADP-ribose<br>CP          | ADP ribose 1,2 cyclic<br>phosphate                        | C <sub>15</sub> H <sub>22</sub> N <sub>5</sub> O <sub>16</sub> P <sub>3</sub>   | 620.02          | 15.0 | C19851 |
| 45 | NAD+                      | Nicotinamide adenine<br>dinucleotide                      | C <sub>21</sub> H <sub>28</sub> N <sub>7</sub> O <sub>14</sub> P <sub>2</sub>   | 663.11          | 10.3 | C00003 |
| 46 | UDP-NAc-<br>muraminate    | UDP-N-acetylmuraminate                                    | C <sub>20</sub> H <sub>31</sub> N <sub>3</sub> O <sub>19</sub> P <sub>2</sub>   | 678.10          | 15.1 | C01050 |
| 47 | NADP+                     | Nicotinamide adenine<br>dinucleotide phosphate<br>(NADP+) | C <sub>21</sub> H <sub>29</sub> N <sub>7</sub> O <sub>17</sub> P <sub>3</sub>   | 743.08          | 14.9 | C00003 |
| 48 | FAD                       | Flavin adenine<br>dinucleotide                            | C <sub>27</sub> H <sub>33</sub> N <sub>9</sub> O <sub>15</sub> P <sub>2</sub>   | 784.15          | 15.3 | C00016 |
| 49 | ACETYL CoA                | Acetyl Coenzyme A                                         | C <sub>23</sub> H <sub>38</sub> N <sub>7</sub> O <sub>17</sub> P <sub>3</sub> S | 808.13          | 15.6 | C00024 |
| 50 | 3-oxohexanoyl<br>CoA      | 3-oxohexanoyl coenzyme A                                  | C <sub>27</sub> H <sub>44</sub> N <sub>7</sub> O <sub>18</sub> P <sub>3</sub> S | 878.18          | 15.5 | C05269 |
| 51 | ---                       | Glycogen                                                  | C <sub>24</sub> H <sub>42</sub> O <sub>21</sub>                                 | Not<br>detected | ---  | C00182 |

**Supplemental File:**

1. Supplementary File S2: Table S5: The area ratios ( $^{12}\text{C}/^{13}\text{C}$ ) for all the metabolites in the wild type and SL3338 strain of *S. elongatus* PCC 11801 under early phase (EP) (XLSX); Table S6: The area ratios ( $^{12}\text{C}/^{13}\text{C}$ ) for all the metabolites in the wild type and SL3338 strain of *S. elongatus* PCC 11801 under late phase (EP) (XLSX).
2. Supplementary File S3: Mass isotopologue distributions (MIDs) of the metabolites (under study) observed in wild type *S. elongatus* PCC 11801 and SL3338 (XLSX).
3. Supplementary File S4: Mean enrichment of the metabolites (under study) observed in wild type *S. elongatus* PCC 11801 and SL3338 (XLSX).



## References:

- Carbonell, V., Vuorio, E., Aro, E.M., Kallio, P., 2019. Enhanced stable production of ethylene in photosynthetic cyanobacterium *Synechococcus elongatus* PCC 7942. *World J. Microbiol. Biotechnol.* 35, 1–9. <https://doi.org/10.1007/s11274-019-2652-7>
- Durall, C., Lindberg, P., Yu, J., Lindblad, P., 2020. Increased ethylene production by overexpressing phosphoenolpyruvate carboxylase in the cyanobacterium *Synechocystis* PCC 6803. *Biotechnol. Biofuels* 13, 16. <https://doi.org/10.1186/s13068-020-1653-y>
- Hasunuma, T., Matsuda, M., Kato, Y., Vavricka, C.J., Kondo, A., 2018. Temperature enhanced succinate production concurrent with increased central metabolism turnover in the cyanobacterium *Synechocystis* sp. PCC 6803. *Metab. Eng.* 48, 109–120. <https://doi.org/10.1016/j.ymben.2018.05.013>
- Lan, E.I., Wei, C.T., 2016. Metabolic engineering of cyanobacteria for the photosynthetic production of succinate. *Metab. Eng.* 38, 483–493. <https://doi.org/10.1016/j.ymben.2016.10.014>
- Mo, H., Xie, X., Zhu, T., Lu, X., 2017. Effects of global transcription factor NtcA on photosynthetic production of ethylene in recombinant *Synechocystis* sp. PCC 6803. *Biotechnol. Biofuels* 10, 1–13. <https://doi.org/10.1186/s13068-017-0832-y>
- Osanai, T., Shirai, T., Iijima, H., Nakaya, Y., Okamoto, M., Kondo, A., Hirai, M.Y., 2015. Genetic manipulation of a metabolic enzyme and a transcriptional regulator increasing succinate excretion from unicellular cyanobacterium. *Front. Microbiol.* 6, 1–10. <https://doi.org/10.3389/fmicb.2015.01064>
- Ungerer, J., Tao, L., Davis, M., Ghirardi, M., Maness, P.C., Yu, J., 2012. Sustained photosynthetic conversion of CO<sub>2</sub> to ethylene in recombinant cyanobacterium *Synechocystis* 6803. *Energy Environ. Sci.* 5, 8998–9006. <https://doi.org/10.1039/c2ee22555g>
- Veetil, V.P., Angermayr, S.A., Hellingwerf, K.J., 2017. Ethylene production with engineered *Synechocystis* sp PCC 6803 strains. *Microb. Cell Fact.* 16, 1–11. <https://doi.org/10.1186/s12934-017-0645-5>
- Xiong, W., Morgan, J.A., Ungerer, J., Wang, B., Maness, P.-C., Yu, J., 2015. The plasticity of cyanobacterial metabolism supports direct CO<sub>2</sub> conversion to ethylene. *Nat. Plants* 1, 15053. <https://doi.org/10.1038/nplants.2015.53>
- Zhu, T., Xie, X., Li, Z., Tan, X., Lu, X., 2015. Enhancing photosynthetic production of ethylene in genetically engineered *Synechocystis* sp. PCC 6803. *Green Chem.* 17, 421–434. <https://doi.org/10.1039/c4gc01730g>
